# Supplementary material
Source: publisher figshare collection journal article supplement (https://plos.figshare.com/articles/dataset/_/5118250)
Supplement: Supplementary file [file 1]

**S2 Fig. Semi-field production of CO<sub>2</sub>.**

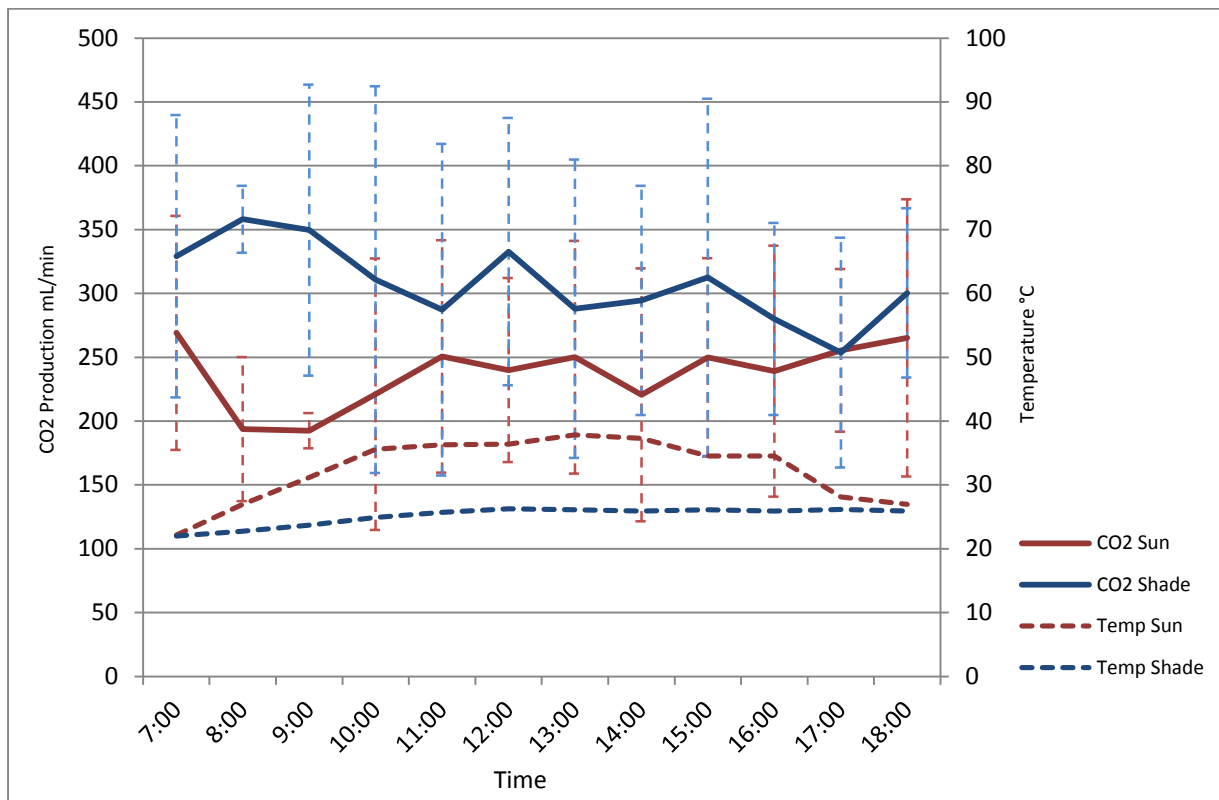

Mean values and 95% CIs of CO<sub>2</sub> (mL/min) produced by mixing 500g brown sugar (locally purchased, Gulu market, Uganda), 50g baker's yeast (Saf-instant Red, Lesaffre, France), and 2.5L water, in 10L containers placed in either in the sun or shade at Gulu University, Uganda. Measurements were made hourly for 11 hours (07:00 – 18:00) and were repeated for four consecutive days.
