# Supplementary material
Source: publisher figshare collection journal article supplement (https://plos.figshare.com/articles/dataset/_/5118250)
Supplement: Supplementary file [file 1]

**S1 Fig. Laboratory production of CO<sub>2</sub>.**

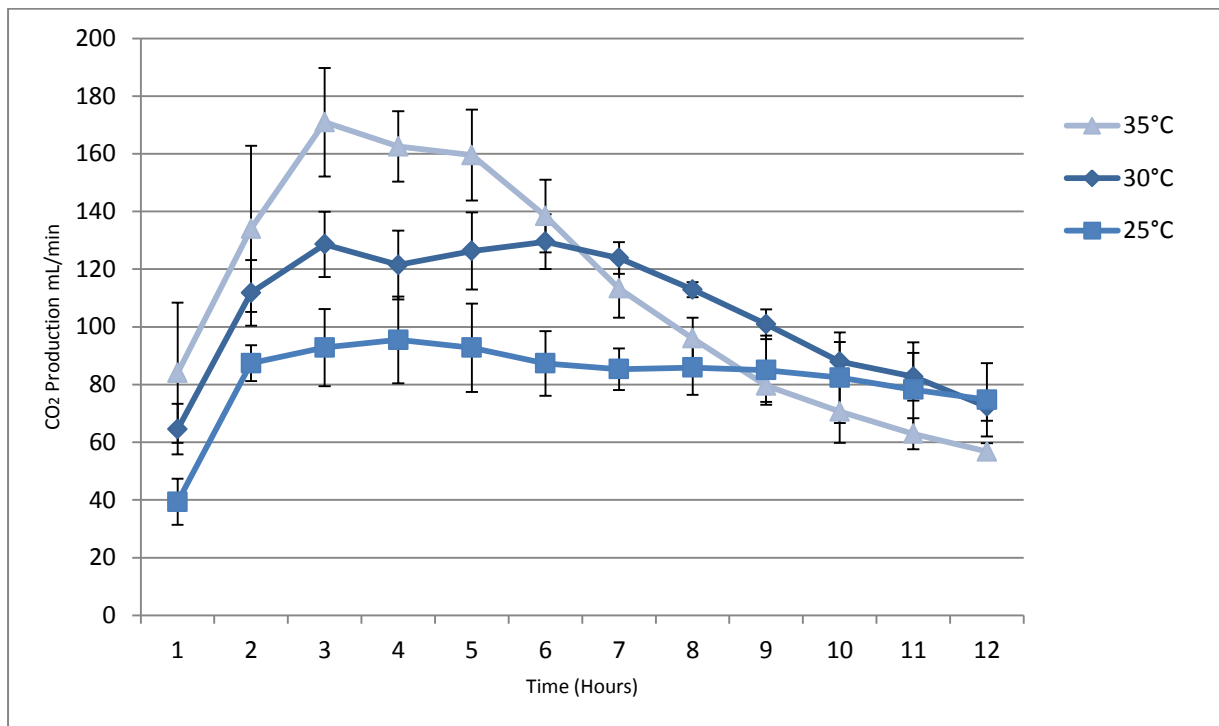

Mean values and 95% CIs of CO<sub>2</sub> (mL/min) produced by mixing 500g white sugar (Delhaize 365 Fine granulated sugar, Delhaize, Belgium), 50g baker's yeast (Saf-instant Red, Lesaffre, France), and 2.5L water, in a 10L container. Mixtures were incubated at 25°C, 30°C and 35°C. Measurements were made hourly for 12 hours and experiments were repeated four times at each temperature. Experiments were carried out at the Institute of Tropical Medicine, Antwerp, Belgium.
